# Supplementary material
Source: PubMed Central journal article supplement (PMC4267123)
Supplement: Supp_Figure1.pdf [file Supp_Figure1.pdf]

## Supplementary Data

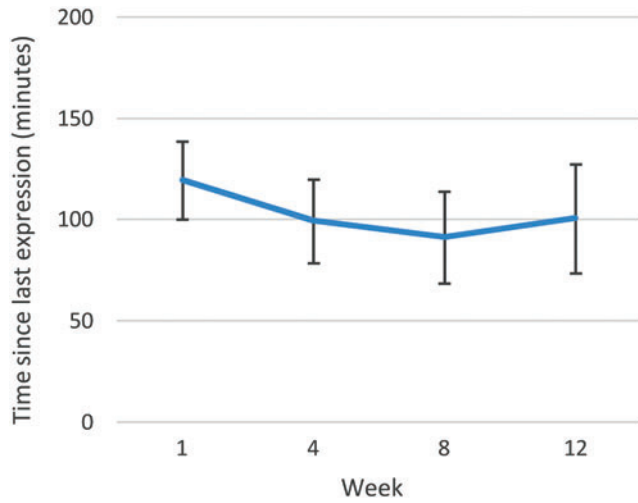

**SUPPLEMENTARY FIG. S1.** Average time since last milk expression over time ( $n=15$  participants). Error bars represent  $\pm 1$  standard error of the mean.
