# Supplementary material
Source: PubMed Central journal article supplement (PMC4267123)
Supplement: Supp_Table1.pdf [file Supp_Table1.pdf]

SUPPLEMENTARY TABLE S1. BREASTMILK SAMPLES RECEIVED FROM ALL PARTICIPANTS (N=15) AND PROCESSED FOR CYTOKINE AND PROTEIN ANALYSES

| <i>ID number</i> | <i>Week</i> |          |          |           |
|------------------|-------------|----------|----------|-----------|
|                  | <i>1</i>    | <i>4</i> | <i>8</i> | <i>12</i> |
| 1                | C           | C        | P        | P         |
| 2                | P           | P        | P        | P         |
| 3                | P           | P        | P        | C         |
| 4                | P           | P        | P        | P         |
| 5                | P           | P        | P        | P         |
| 6                | P           | P        | P        | C         |
| 7                | P           | P        | P        | P         |
| 8                | P           | P        | C        | C         |
| 9                | P           | P        | P        | P         |
| 10               | P           | C        | P        | P         |
| 11               | P           | C        | P        | —         |
| 12               | P           | P        | P        | P         |
| 13               | P           | P        | P        | —         |
| 14               | P           | P        | P        | P         |
| 15               | C           | C        | —        | —         |

Breastmilk samples are marked “C” if only cytokine arrays were completed, “P” if total protein was quantified in addition to cytokine expression, and a dash (—) if the sample was missing.
