# Supplementary material
Source: PubMed Central journal article supplement (PMC4267123)
Supplement: Supp_Table2.pdf [file Supp_Table2.pdf]

SUPPLEMENTARY TABLE S2. PEARSON CORRELATIONS  
 OF OVERALL CYTOKINE EXPRESSION CORRELATIONS ACROSS  
 THREE FREEZE-THAW CYCLES

|                      | <i>Fresh<br/>milk</i> | <i>1 freeze-<br/>thaw cycle</i> | <i>2 freeze-<br/>thaw cycles</i> |
|----------------------|-----------------------|---------------------------------|----------------------------------|
| Fresh milk           | 1                     | 0.974                           | 0.994                            |
| 1 freeze-thaw cycle  | 0.974                 | 1                               | 0.977                            |
| 2 freeze-thaw cycles | 0.994                 | 0.977                           | 1                                |
