# Supplementary material
Source: PubMed Central journal article supplement (PMC4267123)
Supplement: Supp_Table3.pdf [file Supp_Table3.pdf]

SUPPLEMENTARY TABLE S3. INDIVIDUAL CYTOKINES  
SIGNIFICANTLY ASSOCIATED WITH TOTAL PROTEIN  
CONCENTRATION

| <i>Cytokine</i> | $\beta$ coefficient | 95% CI         | p value | q value |
|-----------------|---------------------|----------------|---------|---------|
| ENA-78          | 1.382               | 0.450, 2.314   | 0.005   | 0.1     |
| GM-CSF          | -0.750              | -1.404, -0.097 | 0.03    | 0.1     |
| IGFBP-1         | 0.750               | 0.056, 1.44    | 0.04    | 0.1     |
| IL-16           | 0.368               | 0.075, 1.576   | 0.03    | 0.1     |
| IL-8            | 1.290               | 0.418, 2.162   | 0.005   | 0.4     |
| MCP-1           | 1.737               | 0.684, 2.790   | 0.002   | 0.4     |
| MCP-4           | -1.100              | -1.822, -0.379 | 0.004   | 0.4     |
| TIMP-2          | 0.311               | 0.019, 1.289   | 0.04    | 0.4     |

All presented correlations were significant at  $p=0.05$ . None had significant false discovery rate  $q$  values ( $q < 0.05$ ).

CI, confidence interval; ENA-78, epithelial-derived neutrophil-activating protein-78; GM-CSF, granulocyte-macrophage colony-stimulating factor; IGFBP-1, insulin-like growth factor-binding protein-1; IL, interleukin; MCP, monocyte chemoattractant protein; TIMP-2, tissue inhibitor of metalloproteinase-2.
